# Supplementary material
Source: PubMed Central journal article supplement (PMC4518838)
Supplement: JB.00232-15_zjb999093693so1.pdf [file JB.00232-15_zjb999093693so1.pdf]

Table S1. Primers and Vectors

| Organism                  | Primers | Description                                                                       | Sequence/ Accession number                                      |
|---------------------------|---------|-----------------------------------------------------------------------------------|-----------------------------------------------------------------|
| <i>E. coli</i>            | XTZ004  | Primers for cloning <i>C. thermocellum</i> AdhE into pEXP5-NT/CT TOPO plasmids    | AAGCTTCATTTCTTCGCA                                              |
| <i>E. coli</i>            | XTZ006  |                                                                                   | ATGACGAAAATAGCGAAT                                              |
| <i>E. coli</i>            | XTZ002  | Primers for cloning <i>T. saccharolyticum</i> AdhE into pEXP5-NT/CT TOPO plasmids | TCTTAAGCTATGCACCG                                               |
| <i>E. coli</i>            | XTZ005  |                                                                                   | ATGGCAACGACAAAAAC                                               |
| <i>C. thermocellum</i>    | XSH0059 | Primers for constructing the <i>C. thermocellum</i> vectors pSH016 and pSH019     | CATAATATATAAGAAACCCCATCTATTTAG<br>TTATTTGTTTGGTCAC              |
| <i>C. thermocellum</i>    | XSH0060 |                                                                                   | TTCCCACGATACCTGCTCCTGTGTATAGG                                   |
| <i>C. thermocellum</i>    | XSH0061 |                                                                                   | GCACAGAAAAGCTAATAGTAGTGAAAAA<br>ATCAG                           |
| <i>C. thermocellum</i>    | XSH0062 |                                                                                   | GTGACCAAACAATAACTAAATAGATGGGG<br>GTTTCTTTTAATATTATG             |
| <i>C. thermocellum</i>    | XSH0063 |                                                                                   | AGGAGCAGGTATCGTGGGAATAGGCATG                                    |
| <i>C. thermocellum</i>    | XSH0064 |                                                                                   | CCTCCAAGCCACTGAACTACTGGGCCAG                                    |
| <i>C. thermocellum</i>    | XSH0065 | C                                                                                 | GTAGTTCAGTGGCTTGGAGGAGCTCTTTTAT<br>C                            |
| <i>C. thermocellum</i>    | XSH0066 |                                                                                   | CTATTAGCAGTTTTCTGTGCATTTTGTCTTTC                                |
| <i>T. saccharolyticum</i> | X12435  | Primers for constructing the <i>T. saccharolyticum</i> vectors pCP14 and pCP14*   | TTTCGACTGAGCCTTTCGTTTTATTGATGCC<br>TGGCTTTGAAAGCGGGTCACTCCAGTA  |
| <i>T. saccharolyticum</i> | X12436  |                                                                                   | TCTTACCTATCACCTCAAATGGTTCGCTGGG<br>TTTTCTTAAGCTATGCACCGTATGCT   |
| <i>T. saccharolyticum</i> | X12437  |                                                                                   | TCCCGAGCGCCTACGAGGAATTTGTATCGCA<br>CAAGTCGAAAGAAATAAATAACGGCTC  |
| <i>T. saccharolyticum</i> | X12438  |                                                                                   | CCGTCAGTAGCTGAACAGGAGGGACAGCTG<br>ATAGAGATGGCAGGATGAAATCAAGAGAA |
| <i>T. saccharolyticum</i> | X12438  |                                                                                   |                                                                 |
| Organism                  | Vectors | Description                                                                       |                                                                 |
| <i>C. thermocellum</i>    | pSH016  | Integration vector                                                                | KP245915                                                        |
| <i>C. thermocellum</i>    | pSH019  | Integration vector, pSH016 with D494G mutation in AdhE.                           | N/A                                                             |
| <i>T. saccharolyticum</i> | pCP14   | Integration vector                                                                | KP851973                                                        |
| <i>T. saccharolyticum</i> | pCP14*  | Integration vector, pCP14 with G544D mutation in AdhE                             | N/A                                                             |

Table S2. End product of strains

| LL number | final pH | final pressure (psig) | hydrogen | co2 | cellobiose | glucose | formate | lacticAcid | aceticAcid | ethanol | succinate | pyruvate | MOPS | malate | measured CO2 corrected with Henry's law | ethanol | cellobiose | ethanol yield          |
|-----------|----------|-----------------------|----------|-----|------------|---------|---------|------------|------------|---------|-----------|----------|------|--------|-----------------------------------------|---------|------------|------------------------|
|           |          |                       | psig     |     |            |         |         |            | mmoles     |         |           |          |      |        | grams                                   | grams   | grams      | g ethanol/g cellobiose |
| LL1004-1  | 7.0      | 7.5                   | 1.6      | 0.7 | 0.00       | 0.00    | 0.32    | 0.02       | 0.88       | 0.84    | 0.00      | 0.00     | 1.98 | 0.01   | 0.98                                    | 0.039   | 0.25       | 0.15                   |
| LL1004-2  | 7.1      | 7.1                   | 1.3      | 1.0 | 0.00       | 0.00    | 0.43    | 0.02       | 0.85       | 0.89    | 0.00      | 0.00     | 1.99 | 0.02   | 1.45                                    | 0.041   | 0.25       | 0.16                   |
| LL346-1   | 6.9      | 11.0                  | 1.9      | 1.3 | 0.00       | 0.00    | 0.31    | 0.18       | 1.03       | 0.60    | 0.00      | 0.00     | 1.99 | 0.02   | 1.82                                    | 0.028   | 0.25       | 0.11                   |
| LL346-2   | 7.0      | 11.1                  | 1.9      | 1.3 | 0.00       | 0.00    | 0.30    | 0.17       | 1.03       | 0.61    | 0.00      | 0.00     | 1.97 | 0.02   | 1.78                                    | 0.028   | 0.25       | 0.11                   |
| LL350-1   | 6.5      | 4.1                   | 0.4      | 0.9 | 0.00       | 0.00    | 0.23    | 0.08       | 0.26       | 1.20    | 0.00      | 0.05     | 2.02 | 0.05   | 1.28                                    | 0.055   | 0.25       | 0.22                   |
| LL350-2   | 6.6      | 4.5                   | 0.3      | 1.1 | 0.00       | 0.00    | 0.17    | 0.06       | 0.18       | 1.15    | 0.00      | 0.06     | 1.98 | 0.06   | 1.49                                    | 0.053   | 0.25       | 0.21                   |
| LL1111-1  | 7.0      | 8.9                   | 1.5      | 1.3 | 0.03       | 0.00    | 0.00    | 1.42       | 0.68       | 0.05    | 0.02      | 0.04     | 1.99 |        | 1.78                                    | 0.002   | 0.25       | 0.01                   |
| LL1111-2  | 7.0      | 7.5                   | 1.5      | 0.8 | 0.00       | 0.00    | 0.03    | 1.24       | 0.74       | 0.03    | 0.00      | 0.00     | 2.02 | 0.01   | 1.16                                    | 0.002   | 0.25       | 0.01                   |
| LL1025-1  | 4.8      | 11.6                  | 1.7      | 2.9 | 0.00       | 0.00    | 0.04    | 0.11       | 0.85       | 1.35    | 0.00      | 0.00     | 1.96 | 0.03   | 4.04                                    | 0.062   | 0.25       | 0.25                   |
| LL1025-2  | 4.8      | 11.4                  | 1.7      | 2.8 | 0.00       | 0.00    | 0.03    | 0.05       | 0.80       | 1.39    | 0.00      | 0.00     | 1.94 | 0.03   | 3.86                                    | 0.064   | 0.25       | 0.26                   |
| LL1049-1  | 5.3      | 6.5                   | 0.2      | 1.4 | 0.00       | 0.00    | 0.20    | 0.00       | 0.11       | 2.33    | 0.00      | 0.00     | 1.99 | 0.00   | 2.01                                    | 0.107   | 0.25       | 0.43                   |
| LL1049-2  | 5.4      | 6.3                   | 0.2      | 2.9 | 0.01       | 0.00    | 0.22    | 0.00       | 0.10       | 2.29    | 0.00      | 0.00     | 1.96 | 0.01   | 4.05                                    | 0.105   | 0.25       | 0.42                   |
| LL1040-1  | 5.6      | 7.0                   | 0.2      | 1.5 | 0.00       | 0.00    | 0.02    | 0.00       | 0.03       | 2.43    | 0.00      | 0.00     | 1.98 | 0.04   | 2.14                                    | 0.112   | 0.25       | 0.45                   |
| LL1040-2  | 5.7      | 6.5                   | 0.2      | 2.9 | 0.01       | 0.00    | 0.03    | 0.00       | 0.03       | 2.42    | 0.00      | 0.00     | 1.96 | 0.05   |                                         | 0.111   | 0.25       | 0.44                   |
| LL1076-1  | 4.9      | 3.8                   | 0.7      | 0.4 | 0.25       | 0.00    | 0.01    | 0.64       | 0.31       | 0.07    | 0.00      | 0.00     | 1.98 | 0.00   | 0.56                                    | 0.003   | 0.25       | 0.01                   |
| LL1076-2  | 4.7      | 8.9                   | 0.1      | 0.7 | 0.00       | 0.13    | 0.15    | 0.73       | 0.30       | 0.01    | 0.04      | 0.00     | 1.14 | 0.00   | 0.93                                    | 0.000   | 0.25       | 0.00                   |
| LL1160-1  | 7.2      | 8.74                  | 1.5      | 1.5 | 0.00       | 0.00    | 0.25    | 0.28       | 0.73       | 0.76    | 0.00      | 0.02     | 1.99 | 0.03   | 2.07                                    | 0.035   | 0.25       | 0.14                   |
| LL1160-2  | 7.1      | 8.87                  | 1.6      | 1.4 | 0.00       | 0.00    | 0.24    | 0.27       | 0.75       | 0.76    | 0.00      | 0.02     | 1.99 | 0.03   | 1.99                                    | 0.035   | 0.25       | 0.14                   |
| LL1161-1  | 7.2      | 6.55                  | 1.0      | 1.2 | 0.00       | 0.00    | 0.31    | 0.16       | 0.46       | 1.32    | 0.00      | 0.02     | 2.00 | 0.02   | 1.73                                    | 0.061   | 0.25       | 0.24                   |
| LL1161-2  | 7.17     | 6.0                   | 0.9      | 0.8 | 0.00       | 0.00    | 0.24    | 0.12       | 0.35       | 1.27    | 0.00      | 0.00     | 1.53 | 0.02   | 1.43                                    | 0.058   | 0.25       | 0.23                   |
| LL1193-1  | 4.6      | 10.21                 | 1.5      | 2.5 | 0.00       | 0.00    | 0.02    | 0.48       | 0.70       | 1.17    | 0.00      | 0.00     | 1.94 | 0.00   | 3.42                                    | 0.054   | 0.25       | 0.21                   |
| LL1193-2  | 4.7      | 10.79                 | 1.6      | 1.5 | 0.00       | 0.00    | 0.03    | 0.41       | 0.73       | 1.17    | 0.00      | 0.01     | 1.98 | 0.00   | 2.11                                    | 0.054   | 0.25       | 0.21                   |
| LL1194-1  | 5.0      | 11.9                  | 1.7      | 3.2 | 0.00       | 0.00    | 0.03    | 0.05       | 0.79       | 1.72    | 0.00      | 0.00     | 1.95 | 0.02   | 4.50                                    | 0.079   | 0.25       | 0.32                   |
| LL1194-2  | 5.0      | 11.88                 | 1.7      | 1.7 | 0.00       | 0.00    | 0.04    | 0.08       | 0.78       | 1.73    | 0.00      | 0.00     | 1.98 | 0.02   | 2.42                                    | 0.079   | 0.25       | 0.32                   |

Table S3. *E. coli* negative control

| REACTION   | sample                                    | specific activity | SD   |
|------------|-------------------------------------------|-------------------|------|
|            |                                           | U/mg of protein   |      |
|            | (-) <sup>a</sup> before heat <sup>b</sup> | 0.09              | 0.00 |
| ADH-NADH   | (-) Eluent 1                              | 0.19              | 0.01 |
|            | (-) Eluent 2                              | 0.00              | 0.07 |
|            | (-) before heat                           | 0.04              | 0.00 |
| ADH-NADPH  | (-) Eluent 1                              | 0.24              | 0.05 |
|            | (-) Eluent 2                              | 0.37              | 0.00 |
|            | (-) before heat                           | 0.02              | 0.00 |
| ALDH-NADH  | (-) Eluent 1                              | 0.35              | 0.01 |
|            | (-) Eluent 2                              | 0.15              | 0.02 |
|            | (-) before heat                           | 0.02              | 0.00 |
| ALDH-NADPH | (-) Eluent 1                              | 0.15              | 0.05 |
|            | (-) Eluent 2                              | 0.05              | 0.05 |

<sup>a</sup> (-) refers to the cell extracts of the *E. coli* expressing the pNT-CALML3 plasmid control plasmid.

<sup>b</sup> "Heat" refers to heat treatment as described in materials and methods.

Table S4. ADH and ALDH activity during the AdhE purification process

| Source of AdhE                   | Strain description        | Cofactor | Fraction     | Total activity  |       | Specific activity |      | Ratio ADH:ALDH |
|----------------------------------|---------------------------|----------|--------------|-----------------|-------|-------------------|------|----------------|
|                                  |                           |          |              | ADH             | ALDH  | ADH               | ALDH |                |
|                                  |                           |          |              | U <sup>-3</sup> |       | U/mg of protein   |      |                |
| <i>C. thermocellum</i> LL1004    | Wild-type                 | NADH     | Cell extract | 295.1           | 148.4 | 14.4              | 7.2  | 2.0            |
|                                  |                           |          | Eluent 1     | 47.8            | 21.8  | 31.9              | 14.5 | 2.2            |
|                                  |                           |          | Eluent 2     | 40.9            | 18.7  | 30.1              | 13.7 | 2.2            |
|                                  |                           |          | Eluent 3     | 39.7            | 19.1  | 40.1              | 19.3 | 2.1            |
| <i>C. thermocellum</i> LL346     | Ethanol-tolerant          | NADH     | Cell extract | 35.5            | 89.9  | 0.9               | 2.4  | 0.4            |
|                                  |                           |          | Eluent 1     | 3.2             | 13.3  | 1.3               | 5.5  | 0.2            |
|                                  |                           |          | Eluent 2     | 3.2             | 9.8   | 2.2               | 6.8  | 0.3            |
|                                  |                           |          | Eluent 3     | 1.2             | 8.5   | 2.3               | 16.9 | 0.1            |
| <i>C. thermocellum</i> LL350     | Moderate-ethanol-producer | NADH     | Cell extract | 237.8           | 163.1 | 11.0              | 7.5  | 1.5            |
|                                  |                           |          | Eluent 1     | 45.5            | 26.4  | 39.5              | 22.9 | 1.7            |
|                                  |                           |          | Eluent 2     | 34.9            | 28.3  | 33.5              | 27.2 | 1.2            |
|                                  |                           |          | Eluent 3     | 19.4            | 16.5  | 44.8              | 38.1 | 1.2            |
| <i>C. thermocellum</i> LL350     | Moderate-ethanol-producer | NADPH    | Cell extract | 131.7           | ND    | 6.1               | ND   | ND             |
|                                  |                           |          | Eluent 1     | 37.0            | ND    | 32.1              | ND   | ND             |
|                                  |                           |          | Eluent 2     | 30.7            | ND    | 29.4              | ND   | ND             |
|                                  |                           |          | Eluent 3     | 19.9            | ND    | 45.9              | ND   | ND             |
| <i>T. saccharolyticum</i> LL1025 | Wild-type                 | NADH     | Cell extract | 285.8           | 3.0   | 7.8               | 0.1  | 94.4           |
|                                  |                           |          | Eluent 1     | 177.5           | 6.9   | 8.9               | 0.3  | 25.9           |
|                                  |                           |          | Eluent 2     | 26.9            | 5.1   | 9.6               | 1.8  | 5.3            |
|                                  |                           |          | Eluent 3     | 9.4             | 8.3   | 20.7              | 18.2 | 1.1            |
| <i>T. saccharolyticum</i> LL1049 | High-ethanol-producer     | NADPH    | Cell extract | 5.8             | 0.9   | 0.4               | 0.1  | 6.6            |
|                                  |                           |          | Eluent 1     | 4.4             | 3.5   | 5.2               | 4.1  | 1.2            |
|                                  |                           |          | Eluent 2     | 4.8             | 3.9   | 9.5               | 7.7  | 1.2            |
|                                  |                           |          | Eluent 3     | 3.9             | 3.9   | 11.6              | 11.8 | 1.0            |
| <i>T. saccharolyticum</i> LL1040 | High-ethanol-producer     | NADPH    | Cell extract | 4.8             | 1.7   | 0.1               | 0.0  | 2.8            |
|                                  |                           |          | Eluent 1     | 5.0             | 2.1   | 0.6               | 0.3  | 2.4            |
|                                  |                           |          | Eluent 2     | 4.2             | 2.1   | 4.4               | 2.2  | 2.1            |
|                                  |                           |          | Eluent 3     | 4.6             | 3.4   | 9.8               | 7.2  | 1.4            |

Table S5. Gel densitometry of affinity-purified AdhE proteins

| Sample      | Peak No. <sup>a</sup> | Area    | Percentage |
|-------------|-----------------------|---------|------------|
| LL1004 AdhE | 1 (AdhE)              | 12190.5 | 73.9       |
|             | 2                     | 4295.7  | 26.1       |
| LL346 AdhE  | 1 (AdhE)              | 23898.4 | 82.8       |
|             | 2                     | 1344.0  | 4.7        |
|             | 3                     | 3626.8  | 12.6       |
| LL350 AdhE  | 1 (AdhE)              | 9227.0  | 86.8       |
|             | 2                     | 1398.6  | 13.2       |
| LL1025 AdhE | 1 (AdhE)              | 15188.9 | 78.9       |
|             | 2                     | 3012.4  | 15.6       |
|             | 3                     | 1058.9  | 5.5        |
| LL1040 AdhE | 1 (AdhE)              | 2882.6  | 78.7       |
|             | 2                     | 779.3   | 21.3       |
| LL1049 AdhE | 1 (AdhE)              | 5338.7  | 89.2       |
|             | 2                     | 645.7   | 10.8       |

<sup>a</sup> Peak numbers refer to the order of visible gel bands starting from the top, with 1 being the largest in protein weight

Table S6. Enzyme activity comparison between native AdhE and His-tagged AdhE

| Reaction-cofactor | Sample <sup>a</sup>                   | specific        | SD   |
|-------------------|---------------------------------------|-----------------|------|
|                   |                                       | activity        |      |
|                   |                                       | U/mg of protein |      |
| ADH-NADH          | WT <i>C. thermocellum</i> AdhE        | 3.41            | 0.08 |
|                   | WT <i>C. thermocellum</i> AdhE-his    | 5.28            | 0.07 |
|                   | WT <i>T. saccharolyticum</i> AdhE     | 15.60           | 0.12 |
|                   | WT <i>T. saccharolyticum</i> AdhE-his | 14.01           | 0.10 |
| ALDH-NADH         | WT <i>C. thermocellum</i> AdhE        | 2.94            | 0.01 |
|                   | WT <i>C. thermocellum</i> AdhE-his    | 2.58            | 0.01 |
|                   | WT <i>T. saccharolyticum</i> AdhE     | 0.01            | 0.02 |
|                   | WT <i>T. saccharolyticum</i> AdhE-his | 0.03            | 0.01 |

<sup>a</sup> The assays were done with *E. coli* cell extracts expressing AdhE without purification

Table S7. Enzyme assay raw data

| Reaction type                | Cofactor type     | Location in paper | Sample <sup>a</sup> | Inhibition <sup>b</sup> | Protein stock conc.<br>ug/ml | NADH/NADPH decrease        |               |                | Reaction      |               |                | specific activity<br>umol/min/mg | Avg. specific activity <sup>c</sup><br>umol/min/mg | SD/<br>umol/min/mg |
|------------------------------|-------------------|-------------------|---------------------|-------------------------|------------------------------|----------------------------|---------------|----------------|---------------|---------------|----------------|----------------------------------|----------------------------------------------------|--------------------|
|                              |                   |                   |                     |                         |                              | baseline <sup>c</sup>      |               |                |               |               |                |                                  |                                                    |                    |
|                              |                   |                   |                     |                         |                              | 1st <sup>d</sup><br>AU/min | 2nd<br>AU/min | avg.<br>AU/min | 1st<br>AU/min | 2nd<br>AU/min | avg.<br>AU/min |                                  |                                                    |                    |
| <b>Purified AdhE samples</b> |                   |                   |                     |                         |                              |                            |               |                |               |               |                |                                  |                                                    |                    |
| ADH                          | NADH              | Table S4          | LL1004 CE           |                         | 2052.2                       | 0.06                       | 0.07          | 0.07           | 2.24          | 2.21          | 2.23           | 14.3801                          |                                                    |                    |
|                              |                   |                   | LL1004 E1           |                         | 149.9                        | 0.01                       | 0.01          | 0.01           | 0.37          | 0.35          | 0.36           | 31.8621                          |                                                    |                    |
|                              |                   |                   | LL1004 E2           |                         | 135.6                        | 0.02                       | 0.03          | 0.03           | 0.32          | 0.33          | 0.32           | 30.0824                          |                                                    |                    |
|                              |                   | Table 3           | LL1004 E3-1         |                         | 98.7                         | 0.01                       | 0.01          | 0.01           | 0.31          | 0.29          | 0.30           | 40.1314                          | 42.23                                              | 3.13               |
|                              |                   |                   | LL1004 E3-2         |                         | 77.03                        | 0.03                       | 0.03          | 0.03           | 0.29          | 0.30          | 0.29           | 46.7465                          |                                                    |                    |
|                              |                   |                   | LL1004 E3-3         |                         | 98.7                         | 0.01                       | 0.01          | 0.01           | 0.31          | 0.29          | 0.30           | 40.1314                          |                                                    |                    |
|                              |                   | Table S8          | LL1004 E3-4         | Ethanol                 | 56.1                         | 0.02                       | 0.03          | 0.02           | 0.20          | 0.19          | 0.20           | 41.8981                          |                                                    |                    |
|                              |                   |                   | LL1004 E3-4         |                         | 56.1                         | 0.02                       | 0.03          | 0.02           | 0.10          | 0.11          | 0.10           | 19.7920                          |                                                    |                    |
|                              |                   |                   | LL1004 E3-3         | NAD                     | 98.7                         | 0.02                       | 0.01          | 0.01           | 0.10          | 0.10          | 0.10           | 11.9280                          |                                                    |                    |
|                              |                   | Table S4          | LL346 CE            |                         | 3777.6                       | 0.08                       | 0.09          | 0.09           | 0.34          | 0.35          | 0.35           | 0.9406                           |                                                    |                    |
|                              |                   |                   | LL346 E1            |                         | 243.2                        | 0.00                       | 0.01          | 0.01           | 0.03          | 0.03          | 0.03           | 1.3205                           |                                                    |                    |
|                              |                   |                   | LL346 E2            |                         | 145                          | 0.00                       | 0.01          | 0.01           | 0.03          | 0.03          | 0.03           | 2.2148                           |                                                    |                    |
|                              |                   | Table 3           | LL346 E3-1          |                         | 50.4                         | 0.03                       | 0.03          | 0.03           | 0.04          | 0.04          | 0.04           | 2.3047                           | 4.02                                               | 1.48               |
|                              |                   |                   | LL346 E3-2          |                         | 71.25                        | 0.02                       | 0.01          | 0.01           | 0.04          | 0.04          | 0.04           | 4.8208                           |                                                    |                    |
|                              |                   |                   | LL346 E3-3          |                         | 70.7                         | 0.01                       | 0.01          | 0.01           | 0.03          | 0.03          | 0.03           | 4.9289                           |                                                    |                    |
|                              |                   | Table S8          | LL346 E3-3          | NAD                     | 70.7                         | 0.00                       | 0.01          | 0.00           | 0.02          | 0.03          | 0.02           | 3.9528                           |                                                    |                    |
|                              |                   |                   | LL346 E3-3          |                         | 70.7                         | 0.01                       | -0.02         | 0.00           | 0.04          | 0.04          | 0.04           | 8.3115                           |                                                    |                    |
|                              |                   |                   | LL350 CE            | Ethanol                 | 2165.4                       | 0.10                       | 0.09          | 0.09           | 1.83          | 1.84          | 1.84           | 10.9819                          |                                                    |                    |
|                              |                   | Table S4          | LL350 E1            |                         | 115.28                       | 0.02                       | 0.03          | 0.03           | 0.36          | 0.36          | 0.36           | 39.5043                          |                                                    |                    |
|                              |                   |                   | LL350 E2            |                         | 104.3                        | 0.02                       | 0.02          | 0.02           | 0.27          | 0.28          | 0.27           | 33.4761                          |                                                    |                    |
|                              |                   |                   | LL350 E3-1          |                         | 43.3                         | 0.04                       | 0.03          | 0.03           | 0.17          | 0.18          | 0.18           | 44.7998                          |                                                    |                    |
|                              |                   | Table 3           | LL350 E3-2          |                         | 31.37                        | 0.00                       | 0.01          | 0.01           | 0.10          | 0.10          | 0.10           | 40.6657                          | 42.67                                              | 7.46               |
|                              |                   |                   | LL350 E3-3          |                         | 62.9                         | 0.00                       | 0.01          | 0.00           | 0.24          | 0.24          | 0.24           | 51.5121                          |                                                    |                    |
|                              |                   |                   | LL350 E3-4          |                         | 43.5                         | 0.01                       | 0.03          | 0.02           | 0.13          | 0.12          | 0.12           | 33.7085                          |                                                    |                    |
|                              |                   | Table S8          | LL350 E3-4          | Ethanol                 | 43.5                         | 0.01                       | -0.01         | 0.00           | 0.06          | 0.06          | 0.06           | 18.8491                          |                                                    |                    |
|                              |                   |                   | LL350 E3-3          | NAD                     | 94.37                        | 0.01                       | 0.01          | 0.01           | 0.05          | 0.05          | 0.05           | 5.6475                           |                                                    |                    |
|                              |                   |                   | LL1025 CE           |                         | 3665.3                       | 0.09                       | 0.11          | 0.10           | 2.17          | 2.21          | 2.19           | 7.7979                           |                                                    |                    |
|                              |                   | Table S4          | LL1025 E1           |                         | 2000.1                       | 0.06                       | 0.09          | 0.08           | 1.36          | 1.39          | 1.38           | 8.8754                           |                                                    |                    |
|                              |                   |                   | LL1025 E2           |                         | 281.96                       | 0.02                       | 0.02          | 0.02           | 0.22          | 0.22          | 0.22           | 9.5503                           |                                                    |                    |
|                              |                   |                   | LL1025 E3-1         |                         | 45.38                        | 0.01                       | 0.00          | 0.01           | 0.08          | 0.07          | 0.08           | 20.7032                          |                                                    |                    |
|                              |                   | Table 3           | LL1025 E3-2         |                         | 120.41                       | 0.02                       | 0.00          | 0.01           | 0.16          | 0.17          | 0.17           | 17.8705                          | 17.43                                              | 2.45               |
|                              |                   |                   | LL1025 E3-3         |                         | 97.5                         | 0.02                       | 0.04          | 0.03           | 0.15          | 0.13          | 0.14           | 15.9082                          |                                                    |                    |
|                              |                   |                   | LL1025 E3-4         |                         | 36.21                        | 0.01                       | 0.02          | 0.02           | 0.06          | 0.06          | 0.06           | 15.2280                          |                                                    |                    |
|                              |                   | Table S8          | LL1025 E3-5         | Ethanol                 | 69.1                         | 0.00                       | 0.00          | 0.00           | 0.05          | 0.05          | 0.05           | 8.7709                           |                                                    |                    |
|                              |                   |                   | LL1025 E3-1         | NAD                     | 45.38                        | 0.00                       | 0.00          | 0.00           | 0.04          | 0.04          | 0.04           | 10.2296                          |                                                    |                    |
|                              |                   |                   | LL1049 E3-1         |                         | 168.4                        | 0.03                       | 0.04          | 0.03           | 0.05          | 0.02          | 0.04           | 0.4463                           |                                                    |                    |
|                              |                   | Table 3           | LL1049 E3-2         |                         | 55.15                        | 0.01                       | 0.00          | 0.00           | 0.01          | 0.01          | 0.01           | 2.2797                           | 0.66                                               | 1.97               |
|                              |                   |                   | LL1049 E3-3         |                         | 171.2                        | 0.08                       | 0.02          | 0.05           | 0.01          | 0.03          | 0.02           | -2.0355                          |                                                    |                    |
|                              |                   |                   | LL1049 E3-4         |                         | 33.2                         | 0.01                       | 0.01          | 0.01           | 0.02          | 0.02          | 0.02           | 1.9552                           |                                                    |                    |
|                              |                   | Table 3           | LL1040 E3-1         |                         | 183.98                       | 0.00                       | 0.02          | 0.01           | 0.01          | 0.00          | 0.01           | -0.1708                          | 0.01                                               | 1.34               |
| LL1040 E3-2                  |                   |                   | 355.2               | 0.05                    | 0.01                         | 0.03                       | 0.03          | 0.06           | 0.05          | 0.6540        |                |                                  |                                                    |                    |
| LL1040 E3-3                  |                   |                   | 47.37               | 0.02                    | 0.01                         | 0.02                       | 0.03          | 0.03           | 0.03          | 2.4521        |                |                                  |                                                    |                    |
| Table S3                     | (-) before heat   |                   | 6739.6              | 0.02                    | 0.03                         | 0.03                       | 0.06          | 0.06           | 0.06          | 0.0910        |                |                                  |                                                    |                    |
|                              | (-) E1            |                   | 176.5               | 0.02                    | 0.01                         | 0.01                       | 0.02          | 0.02           | 0.02          | 0.1897        |                |                                  |                                                    |                    |
|                              | (-) E2            |                   | 110.3               | 0.02                    | 0.02                         | 0.01                       | 0.00          | 0.00           | 0.00          | -0.8673       |                |                                  |                                                    |                    |
| additional data <sup>e</sup> | (-) E3-1          |                   | 1516                | 0.02                    | 0.02                         | 0.02                       | 0.04          | 0.09           | 0.06          | 0.4219        |                |                                  |                                                    |                    |
|                              | (-) E3-2          |                   | 1202.4              | 0.02                    | 0.03                         | 0.02                       | 0.00          | 0.02           | 0.01          | -0.1703       |                |                                  |                                                    |                    |
|                              | (-) E3-3          |                   | 487                 | 0.02                    | 0.01                         | 0.02                       | 0.03          | 0.03           | 0.03          | 0.3003        |                |                                  |                                                    |                    |
| Table 3                      | (-) CE after heat |                   | 1716.44             | 0.10                    | 0.10                         | 0.10                       | 0.15          | 0.15           | 0.15          | 0.3686        |                |                                  |                                                    |                    |
|                              | LL1004 E3-1       |                   | 210.8               | 0.02                    | -0.01                        | 0.01                       | 0.01          | 0.04           | 0.02          | 1.0761        |                |                                  |                                                    |                    |
|                              | LL1004 E3-2       |                   | 98.7                | 0.01                    | 0.01                         | 0.01                       | 0.03          | 0.03           | 0.03          | 2.8383        |                |                                  |                                                    |                    |
| Table 3                      | LL346 E3-1        |                   | 154.6               | 0.07                    | 0.01                         | 0.04                       | 0.03          | 0.03           | 0.03          | -0.2121       | 0.03           | 0.34                             |                                                    |                    |
|                              | LL346 E3-2        |                   | 50.4                | 0.03                    | 0.04                         | 0.03                       | 0.04          | 0.04           | 0.04          | 0.2711        |                |                                  |                                                    |                    |
|                              | LL350 CE          |                   | 2165.4              | 0.09                    | 0.12                         | 0.10                       | 1.07          | 1.07           | 1.07          | 6.0805        |                |                                  |                                                    |                    |
| Table S4                     | LL350 E1          |                   | 115.28              | 0.02                    | 0.02                         | 0.02                       | 0.30          | 0.28           | 0.29          | 32.1251       |                |                                  |                                                    |                    |
|                              | LL350 E2          |                   | 104.3               | 0.02                    | 0.04                         | 0.03                       | 0.24          | 0.27           | 0.25          | 29.4144       |                |                                  |                                                    |                    |
|                              | LL350 E3-1        |                   | 43.3                | 0.00                    | 0.02                         | 0.01                       | 0.15          | 0.17           | 0.16          | 45.9360       |                |                                  |                                                    |                    |
| Table 3                      | LL350 E3-2        |                   | 62.9                | 0.03                    | 0.05                         | 0.04                       | 0.21          | 0.22           | 0.22          | 37.5858       | 42.30          | 4.28                             |                                                    |                    |
|                              | LL350 E3-3        |                   | 43.5                | 0.03                    | 0.01                         | 0.02                       | 0.15          | 0.16           | 0.16          | 43.3843       |                |                                  |                                                    |                    |
|                              | LL350 E3-3        | Ethanol           | 43.5                | 0.03                    | 0.01                         | 0.02                       | 0.05          | 0.06           | 0.05          | 9.9272        |                |                                  |                                                    |                    |
| Table S8                     | LL350 E3-4        | NADP              | 94.37               | 0.03                    | 0.02                         | 0.03                       | 0.06          | 0.05           | 0.05          | 4.0546        |                |                                  |                                                    |                    |
|                              | LL1025 E3-1       |                   | 97.5                | 0.05                    | 0.05                         | 0.05                       | 0.06          | 0.08           | 0.07          | 2.6630        |                |                                  |                                                    |                    |
|                              | LL1025 E3-2       |                   | 45.38               | 0.03                    | 0.03                         | 0.03                       | 0.04          | 0.04           | 0.04          | 2.2002        |                |                                  |                                                    |                    |
| Table S4                     | LL1029 CE         |                   | 1513.87             | 0.02                    | 0.01                         | 0.01                       | 0.06          | 0.05           | 0.05          | 0.3823        |                |                                  |                                                    |                    |
|                              | LL1049 E1         |                   | 84.8                | 0.01                    | 0.01                         | 0.01                       | 0.04          | 0.05           | 0.04          | 5.1568        |                |                                  |                                                    |                    |
|                              | LL1049 E2         |                   | 50.46               | 0.02                    | 0.01                         | 0.01                       | 0.05          | 0.05           | 0.05          | 9.4787        |                |                                  |                                                    |                    |
| Table 3                      | LL1049 E3-1       |                   | 33.2                | 0.01                    | 0.01                         | 0.01                       | 0.04          | 0.04           | 0.04          | 11.6487       | 12.70          | 2.18                             |                                                    |                    |
|                              | LL1049 E3-2       |                   | 34.33               | 0.01                    | 0.01                         | 0.01                       | 0.05          | 0.05           | 0.05          | 15.2061       |                |                                  |                                                    |                    |
|                              | LL1049 E3-3       |                   | 55.15               | 0.02                    | 0.00                         | 0.01                       | 0.05          | 0.06           | 0.06          | 11.2373       |                |                                  |                                                    |                    |
| Table S8                     | LL1049 E3-3       | Ethanol           | 55.157              | 0.04                    | 0.03                         | 0.04                       | 0.06          | 0.06           | 0.06          | 4.7074        |                |                                  |                                                    |                    |
|                              | LL1049 E3-3       | NADP              | 55.157              | 0.01                    | 0.01                         | 0.01                       | 0.03          | 0.03           | 0.03          | 3.8774        |                |                                  |                                                    |                    |
|                              | LL1040 CE         |                   | 6301.2              | 0.01                    | 0.00                         | 0.01                       | 0.04          | 0.04           | 0.04          | 0.0755        |                |                                  |                                                    |                    |
| Table S4                     | LL1040 E1         |                   | 821.68              | 0.03                    | 0.01                         | 0.02                       | 0.05          | 0.06           | 0.06          | 6.6095        |                |                                  |                                                    |                    |
|                              | LL1040 E2         |                   | 95.29               | 0.01                    | 0.00                         | 0.01                       | 0.04          | 0.04           | 0.04          | 4.4314        |                |                                  |                                                    |                    |
|                              | LL1040 E3-1       |                   | 47.37               | 0.01                    | 0.00                         | 0.00                       | 0.04          | 0.04           | 0.04          | 9.7508        |                |                                  |                                                    |                    |
| Table 3                      | LL1040 E3-2       |                   | 37.69               | 0.02                    | 0.02                         | 0.02                       | 0.06          | 0.07           | 0.06          | 16.1710       | 12.96          | 4.54                             |                                                    |                    |
|                              | LL1040 E3-1       | Ethanol           | 47.37               | 0.02                    | 0.00                         | 0.01                       | 0.03          | 0.03           | 0.03          | 5.1928        |                |                                  |                                                    |                    |
|                              | LL1040 E3-1       | NADP              | 47.37               | 0.01                    | 0.01                         | 0.01                       | 0.02          | 0.02           | 0.02          | 4.8610        |                |                                  |                                                    |                    |
| Table S3                     | (-) before heat   |                   | 6739.6              | 0.02                    | 0.02                         | 0.02                       | 0.04          | 0.04           | 0.04          | 0.0419        |                |                                  |                                                    |                    |
|                              | (-) E1            |                   | 176.5               | 0.03                    | 0.03                         | 0.03                       | 0.03          | 0.03           | 0.03          | 0.2439        |                |                                  |                                                    |                    |
|                              | (-) E2            |                   | 110.3               | 0.02                    | 0.02                         | 0.02                       | 0.02          | 0.02           | 0.02          | 0.3717        |                |                                  |                                                    |                    |
| additional data <sup>e</sup> | (-) E3-1          |                   | 450.6               | 0.01                    | 0.00                         | 0.01                       | 0.02          | 0.02           | 0.02          | 0.4579        |                |                                  |                                                    |                    |
|                              | (-) E3-2          |                   | 1516                | 0.04                    | 0.02                         | 0.03                       | 0.05          | 0.06           | 0.05          | 0.2208        |                |                                  |                                                    |                    |
|                              | (-) E3-3          |                   | 1202.4              | 0.05                    | 0.05                         | 0.05                       | 0.07          | 0.06           | 0.06          | 0.1392        |                |                                  |                                                    |                    |
| Table 3                      | (-) CE after heat |                   | 1716.44             | 0.08                    | 0.07                         | 0.07                       | 0.12          | 0.11           | 0.11          | 0.3284        |                |                                  |                                                    |                    |
|                              | LL1004 E3-1       |                   | 110.8               | 0.02                    | 0.01                         | 0.01                       | 0.03          | 0.03           | 0.03          | 2.8383        |                |                                  |                                                    |                    |
|                              | LL346 E3-1        |                   | 154.6               | 0.07                    | 0.01                         | 0.04                       | 0.03          | 0.03           | 0.03          | -0.2121       |                |                                  |                                                    |                    |
| Table 3                      | LL346 E3-2        |                   | 50.4                | 0.03                    | 0.04                         | 0.03                       | 0.04          | 0.04           | 0.04          | 0.2711        | 0.03           | 0.34                             |                                                    |                    |
|                              | LL350 CE          |                   | 2165.4              | 0.09                    | 0.12                         | 0.10                       | 1.07          | 1.07           | 1.07          | 6.0805        |                |                                  |                                                    |                    |
|                              | LL350 E1          |                   | 115.28              | 0.02                    | 0.02                         | 0.02                       | 0.30          | 0.28           | 0.29          | 32.1251       |                |                                  |                                                    |                    |
| Table S4                     | LL350 E2          |                   | 104.3               | 0.02                    | 0.04                         | 0.03                       | 0.24          | 0.27           | 0.25          | 29.4144       |                |                                  |                                                    |                    |
|                              | LL350 E3-1        |                   | 43.3                | 0.00                    | 0.02                         | 0.01                       | 0.15          | 0.17           | 0.16          | 45.9360       |                |                                  |                                                    |                    |
|                              | LL350 E3-2        |                   | 62.9                | 0.03                    | 0.05                         | 0.04                       | 0.21          | 0.22           | 0.22          | 37.5858       |                |                                  |                                                    |                    |
| Table 3                      | LL350 E3-3        |                   | 43.5                | 0.03                    | 0.01                         | 0.02                       | 0.15          | 0.16           | 0.16          | 43.3843       | 42.30          | 4.28                             |                                                    |                    |
|                              | LL350 E3-3        | Ethanol           | 43.5                | 0.03                    | 0.01                         | 0.02                       | 0.05          | 0.06           | 0.05          | 9.9272        |                |                                  |                                                    |                    |
|                              | LL350 E3-4        | NADP              | 94.37               | 0.03                    | 0.02                         | 0.03                       | 0.06          | 0.05           | 0.05          | 4.0546        |                |                                  |                                                    |                    |
| Table S8                     | LL1025 E3-1       |                   | 97.5                | 0.05                    | 0.05                         | 0.05                       | 0.06          | 0.08           | 0.07          | 2.6630        | 2.43           | 0.33                             |                                                    |                    |
|                              | LL1025 E3-2       |                   | 45.38               | 0.03                    | 0.03                         | 0.03                       | 0.04          | 0.04           | 0.04          | 2.2002        |                |                                  |                                                    |                    |
|                              | LL1029 CE         |                   | 1513.87             | 0.02                    | 0.01                         | 0.01                       | 0.06          | 0.05           | 0.05          | 0.3823        |                |                                  |                                                    |                    |
| Table S4                     | LL1049 E1         |                   | 84.8                | 0.01                    | 0.01                         | 0.01                       | 0.04          |                |               |               |                |                                  |                                                    |                    |

Table S8. Inhibition of purified AdhE activity by ethanol, NAD<sup>+</sup> or NADP<sup>+</sup>

| Source of AdhE                   | Strain description        | Cofactor | ADH activity |                      |                                  | ALDH activity   |                     |
|----------------------------------|---------------------------|----------|--------------|----------------------|----------------------------------|-----------------|---------------------|
|                                  |                           |          | Control      | Ethanol <sup>a</sup> | NAD(P) <sup>+</sup> <sup>b</sup> | Control         | NAD(P) <sup>+</sup> |
| <i>C. thermocellum</i> LL1004    | Wild-type                 | NADH     | 42.23        | 19.79                | 11.93                            | 18.02           | 5.13                |
| <i>C. thermocellum</i> LL346     | Ethanol-tolerant          | NADH     | 4.02         | 8.31                 | 3.95                             | 13.88           | 12.73               |
| <i>C. thermocellum</i> LL350     | Moderate-ethanol-producer | NADH     | 42.67        | 18.85                | 5.65                             | 31.50           | 2.97                |
|                                  |                           | NADPH    | 42.30        | 9.93                 | 4.05                             | ND <sup>c</sup> | ND                  |
| <i>T. saccharolyticum</i> LL1025 | Wild-type                 | NADH     | 17.43        | 8.77                 | 10.23                            | 10.63           | 1.10                |
| <i>T. saccharolyticum</i> LL1049 | High-ethanol-producer     | NADPH    | 12.70        | 4.71                 | 3.88                             | 11.13           | 5.95                |
| <i>T. saccharolyticum</i> LL1040 | High-ethanol-producer     | NADPH    | 12.96        | 5.19                 | 4.86                             | 5.73            | 3.62                |

<sup>a</sup> Ethanol concentration was 1 M.

<sup>b</sup> NAD(P)<sup>+</sup> concentration was 2.35 mM. NAD(P)<sup>+</sup> inhibition was measured with the significantly linked cofactor, i.e. NADH for LL1004, LL346 and LL1025 AdhE; NADPH for LL1040 and LL1049 AdhE. LL350 AdhE behaved similarly to inhibition to both cofactors, thus both measurements were presented.

<sup>c</sup> Not determined, this enzyme was not significantly NADPH-linked in ALDH activity.
